# Supplementary material for: Structural analysis of disease-related TDP-43 D169G mutation: linking enhanced stability and caspase cleavage efficiency to protein accumulation
Source: PubMed Central journal article supplement (PMC4756693; doi:10.1038/srep21581), 2016-02-17
Supplement: srep21581-s1.pdf [file srep21581-s1.pdf]

## **Supplementary Information**

### **Structural analysis of disease-related TDP-43 D169G mutation: linking enhanced stability and caspase cleavage efficiency to protein accumulation**

Chien-Hao Chiang<sup>1,2</sup>, Cédric Grauffel<sup>3</sup>, Lien-Szu Wu<sup>1</sup>, Pan-Hsien Kuo<sup>1</sup>, Lyudmila G.  
Doudeva<sup>1&</sup>, Carmay Lim<sup>3</sup>, Che-Kun James Shen<sup>1</sup> and Hanna S. Yuan<sup>1\*</sup>

Supplementary data: Supplementary Figure 1

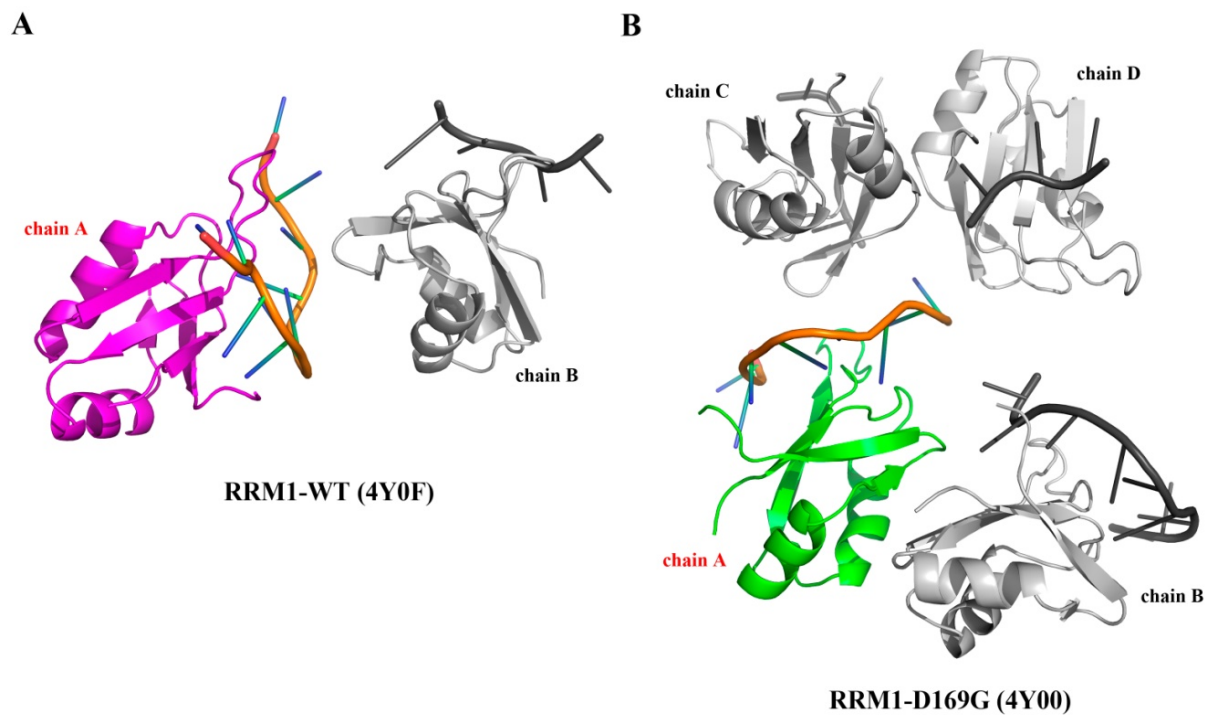

**Supplementary Figure 1.** The overall crystal structures of RRM1-WT and RRM1-D169G. (A) The final refined model of RRM1/DNA complex contains two RRM1 polypeptide chains (chain A and B) and two single-stranded DNA per asymmetric unit. The PDB accession code for RRM1/DNA complex is 4Y0F. (B) The final refined model of RRM1-D169G/DNA complex contains four RRM1 polypeptide chains (chain A to D) and four single-stranded DNA per asymmetric unit. The PDB accession code for RRM1-D169G/DNA complex is 4Y00. For clarity, only a single RRM1/DNA (chain A in magenta) and RRM1-D169G/DNA (chain A in green) were used for structural presentation and comparison.
